# Supplementary material for: Hollow and inward-bumpy gold nanoshells fabricated using expanded silica mesopores as templates
Source: Royal Society of Chemistry journal article supplement (doi:10.1039/c9nj01713e), 2019-01-01
Supplement: c9nj01713e1.pdf [file c9nj01713e1.pdf]

## Supporting Information

### Hollow and inward-bumpy gold nanoshells fabricated using expanded silica mesopores as templates

*Joon Ki Kim and Du-Jeon Jang\**

Department of Chemistry, Seoul National University, Seoul 08826, Korea

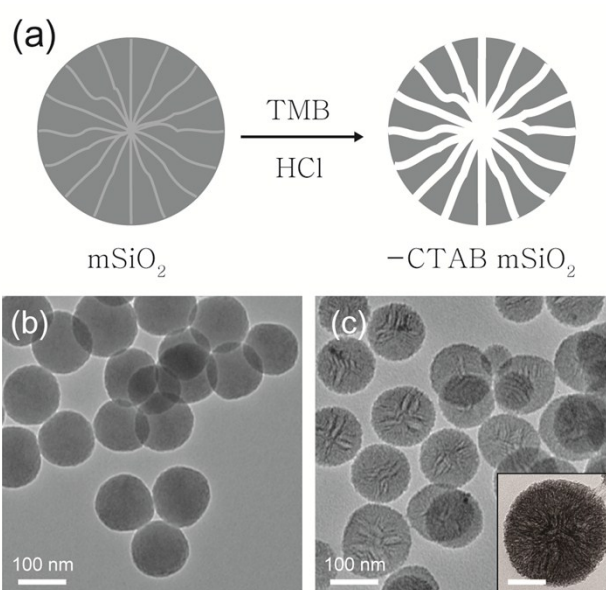

**Fig. S1** (a) Schematic illustration for the fabrication of pore-expanded mSiO<sub>2</sub> NPs. (b,c) TEM images of (b) mSiO<sub>2</sub> NPs and (c) pore-expanded mSiO<sub>2</sub> NPs. The scale bar in the inset of Fig. S1c indicates 50 nm.

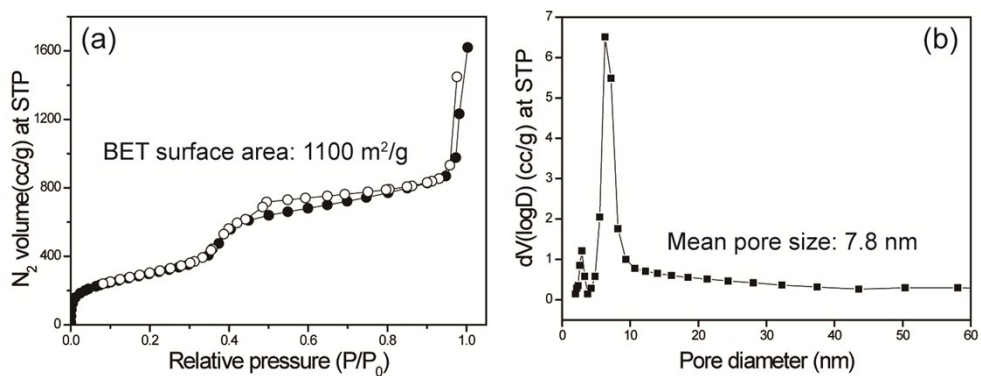

**Fig. S2** (a)  $N_2$  adsorption/desorption isotherms of pore-expanded  $mSiO_2$  NPs, where closed and open circles correspond to adsorption and desorption points, respectively. (b) Pore-size distribution plot corresponding to the  $N_2$  adsorption/desorption isotherm of pore-expanded  $mSiO_2$  NPs.

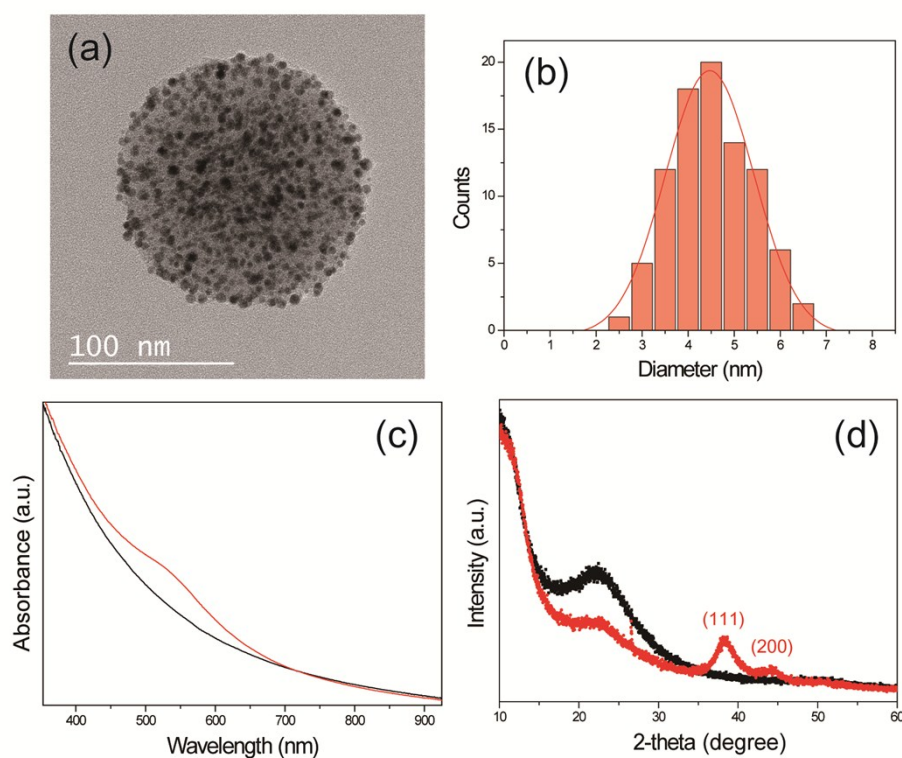

**Fig. S3** (a) HRTEM image of Au- $mSiO_2$  NPs. (b) Size-histogram of Au seed in Au- $mSiO_2$  NPs. (c) UV-vis absorption and (d) XRD data of (black)  $mSiO_2$  NPs and (red) Au- $mSiO_2$  NPs.

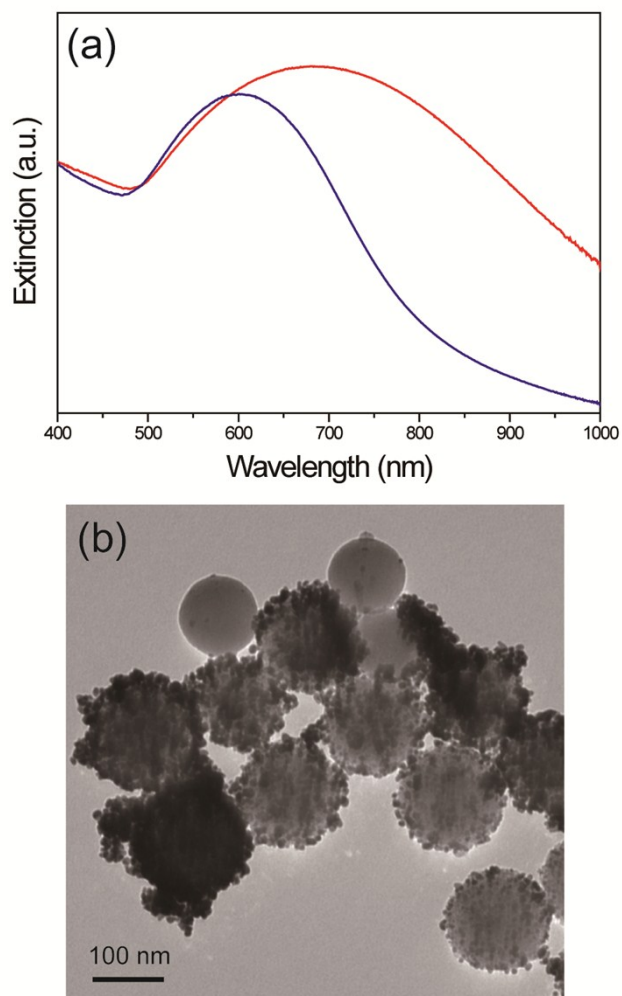

**Fig. S4** (a) UV-vis extinction spectra of Au NPs synthesized by (blue) the conventional method and (red) our sequential reduction method. (b) TEM image of irregular Au NPs synthesized by the conventional method.

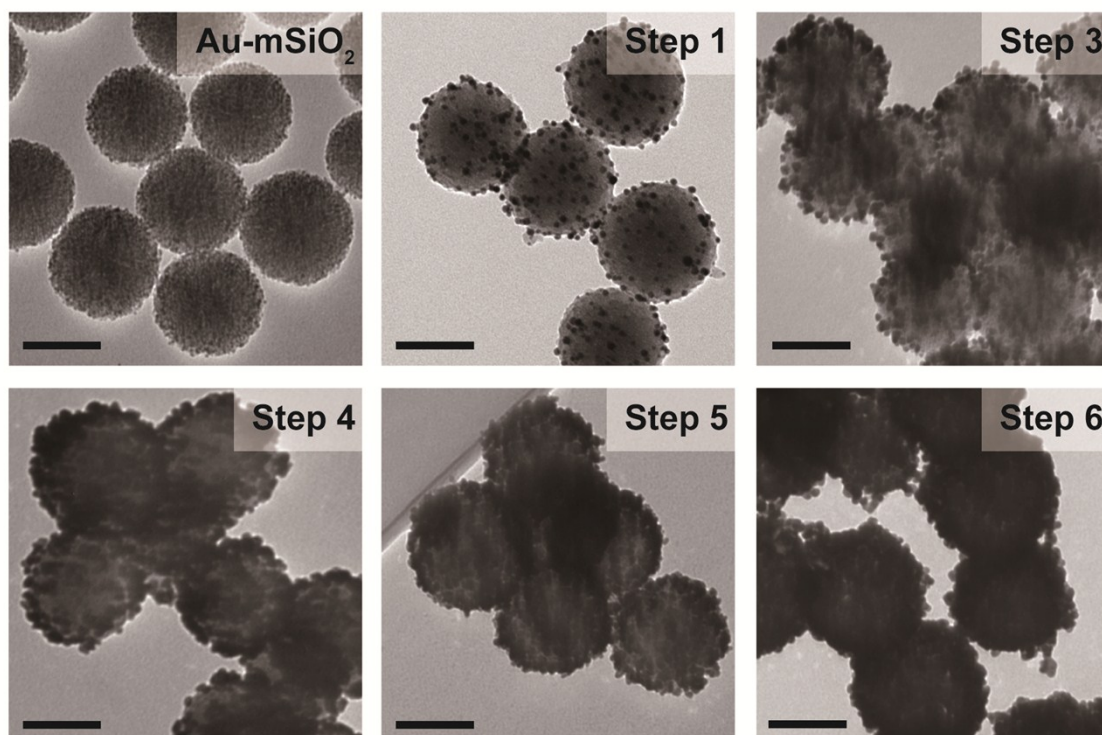

**Fig. S5** TEM images of progressively growing Au NSs. Each scale bar indicates 100 nm.

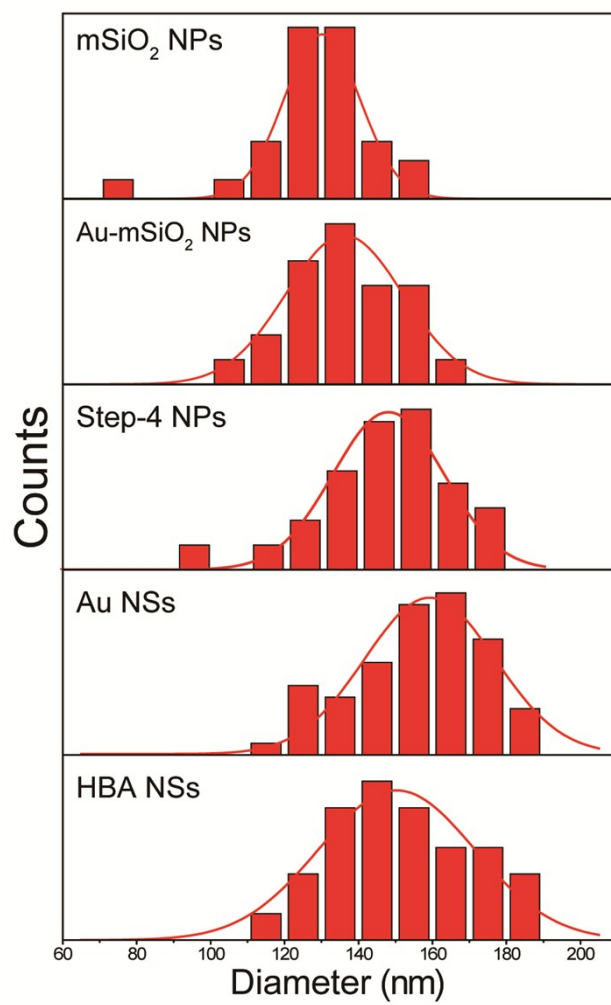

**Fig. S6** Particle size-distribution histograms of respectively indicated samples.

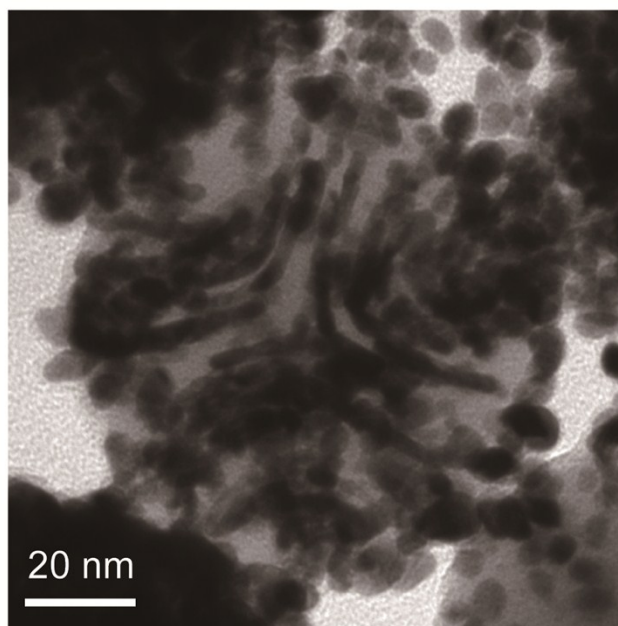

**Fig. S7** TEM image of inward grown Au nanotips in mesoporous silica NPs.

### - Calculations of Raman enhancement factors.

The SERS enhancement factor (EF) has been calculated following the reported method:<sup>30</sup>  $EF = (I_{SERS} \times N_{Raman}) / (I_{Raman} \times N_{SERS})$ , where  $I_{SERS}$  and  $I_{Raman}$  are the SERS intensity and the normal Raman intensity, respectively.  $N_{SERS}$  and  $N_{Raman}$  are the numbers of probed molecules in the measurements of SERS and normal Raman, respectively. For SERS measurements, a  $V_{SERS}$  volume of a R6G ethanol solution with a concentration of  $C_{SERS}$  was dropped to an area of  $S_{SERS}$  on the substrate of HBA NSs supported on a Si wafer. For normal Raman measurements, a  $V_{Raman}$  volume of a R6G ethanol solution with a concentration of  $C_{Raman}$  was dropped to an area of  $S_{Raman}$  on a Si wafer. Ethanol on both wafers was dried in ambient conditions, and the spot sizes of the laser were the same throughout measurements. Thus,

$$EF = \frac{I_{SERS}}{I_{Raman}} \cdot \frac{C_{Raman} V_{Raman}}{C_{SERS} V_{SERS}} \cdot \frac{S_{SERS}}{S_{Raman}}$$

In SERS measurements, 10  $\mu$ L of a 10  $\mu$ M R6G ethanol solution was spread over a circular area of 13 mm<sup>2</sup> on the substrate of HBA NSs. However, in normal Raman measurements, 10  $\mu$ L of a 0.10 M R6G ethanol solution was spread over a circular area 13 mm<sup>2</sup> on a Si wafer.  $I_{SERS} / I_{Raman}$  was 1000 / 55 for the band at 1382 cm<sup>-1</sup>. Therefore, EF was calculated as  $1.8 \times 10^5$ .

Table S1. SERS EFs of various plasmonic nanoparticles.

| Entry                                                                                                             | EF                | Excitation wavelength,<br>Raman probe | Reference |
|-------------------------------------------------------------------------------------------------------------------|-------------------|---------------------------------------|-----------|
| 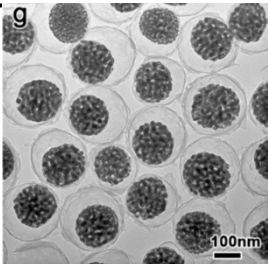 <p>Porous Au-Ag nanospheres</p> | $1.3 \times 10^7$ | 633 nm, crystal violet                | ref. 24   |
|  <p>Island-on-Au NSs</p>         | $5.0 \times 10^6$ | 633 nm, crystal violet                | ref. 11   |
|  <p>Au nanorings array</p>     | $5.0 \times 10^5$ | 532 nm,<br>4-aminothiophenol          | ref. 41   |
|  <p>HBA NSs</p>                | $1.8 \times 10^5$ | 532 nm, R6G                           | this work |
|  <p>Ag nanoplates</p>          | $1.7 \times 10^5$ | 633 nm, R6G                           | ref 42    |



|                                                                                                                                  |                   |                        |         |
|----------------------------------------------------------------------------------------------------------------------------------|-------------------|------------------------|---------|
| 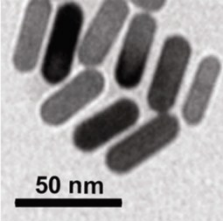 <p>Au nanorods</p>                             | $1.7 \times 10^5$ | 785 nm, rose bengal    | ref. 40 |
|  <p>Hollow and porous Au NSs</p>                | $1.0 \times 10^5$ | 532 nm, methylene blue | ref. 17 |
|  <p>Au-mSiO<sub>2</sub> hybrid microspheres</p> | $3.2 \times 10^3$ | 633 nm, crystal violet | ref. 22 |

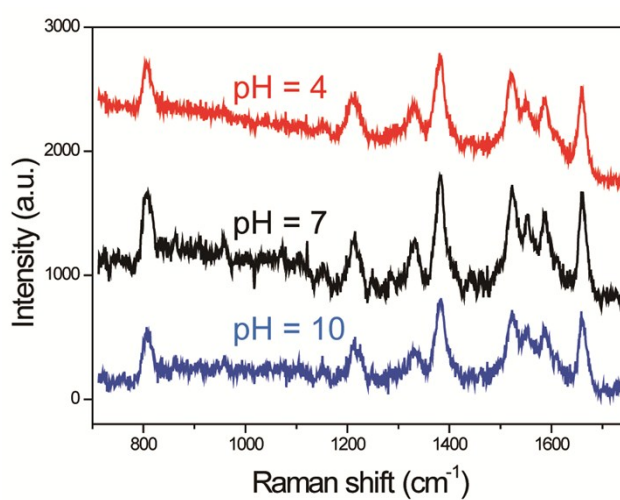

**Fig. S8** SERS spectra of 10 μM R6G(ethanol) adsorbed on HBA NSs at different pH values.

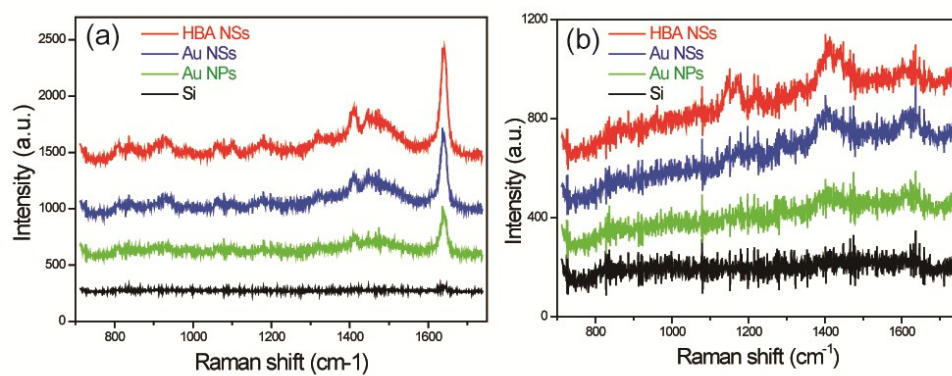

**Fig. S9** SERS spectra of (a) 10 μM MB(ethanol) and (b) 10 μM MO(aq) adsorbed on HBA NSs, Au NSs, Au NPs, and Si. Note that 0.10 M MB(ethanol) and 0.10 M MO(aq) were used to record the Raman signals of the Si substrate.
